# Supplementary material
Source: Springer Nature journal article supplement (https://www.springermedizin.de/resource/supplementary/12990_2013_607_MOESM4_ESM.pdf/9613620)

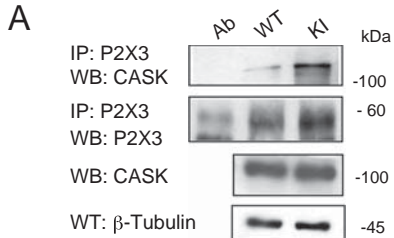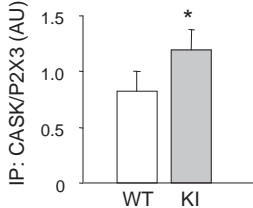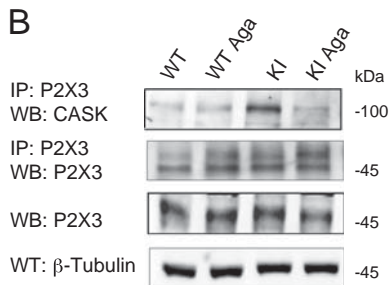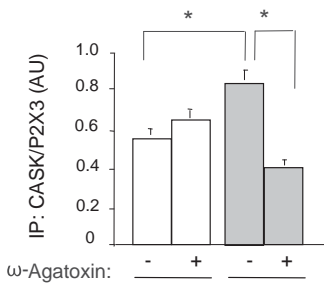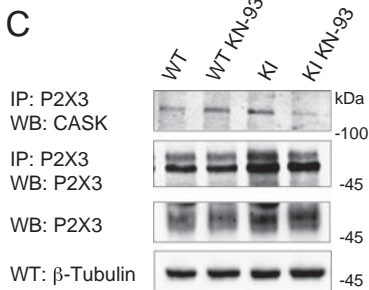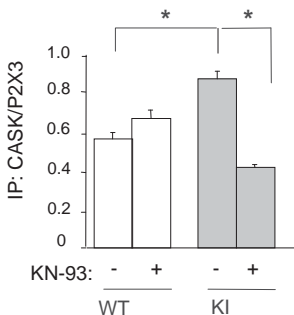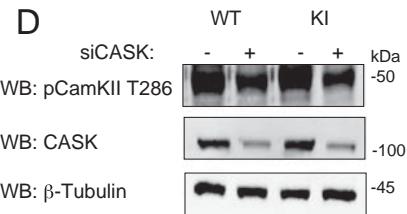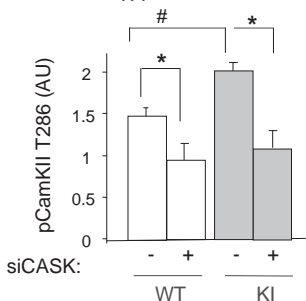

Supplement: MOESM4 [file 9613620]
